# Supplementary material for: ZnS anisotropic nanocrystals using a one-pot low temperature synthesis
Source: Royal Society of Chemistry journal article supplement (doi:10.1039/c4nj01482k), 2014-10-16
Supplement: c4nj01482k1.pdf [file c4nj01482k1.pdf]

*Electronic Supplementary Material (ESI) for New  
Journal of Chemistry:*

ZnS Anisotropic Nanocrystals by One Pot Low  
Temperature Synthesis

Aude Buffard,<sup>a</sup> Brice Nadal,<sup>b</sup> Hadrien Heuclin,<sup>b</sup> Gilles Patriarche,<sup>c</sup> Benoit Dubertret<sup>a\*</sup>

<sup>a</sup>Laboratoire de Physique et d'Étude des Matériaux, PSL Research University, CNRS UMR 8213, Sorbonne Universités UPMC Univ Paris 06, ESPCI ParisTech, 10 rue Vauquelin, 75005 Paris, France.

<sup>b</sup>Nexdot 10 rue Vauquelin, 75005 Paris, France

<sup>c</sup>Laboratoire de Photonique et Nanostructures, CNRS, Route de Nozay 91460, Marcoussis, France.

\*  
E-mail : benoit.dubertret@espci.fr

## Materials

Thioacetamide (TAA, Sigma-Aldrich, 99%), zinc nitrate hexahydrate (Riedel-de Haën, 98%), octylamine (OCA, Sigma-Aldrich, 99%), oleylamine (OLA, Acros Organics C18-content 80-90%), chloroform (VWR Chemicals, 99%), ethanol (VWR Chemicals, 99%), n-hexane (VWR Chemicals, 99%) are purchased for the synthesis of the nanoplatelets and used without any further purification.

## Materials Characterization

Optical absorption and photoluminescence spectroscopy are performed using respectively an UV visible spectrometer (Varian Cary 5E) and photoluminescence spectrometer (Jobin-Yvon Horiba, Fluoromax-3). Transmission electron microscopy (TEM) imaging is done using a JEOL 2010, while X-rays diffractograms are obtained from a Philips X'Pert system with a Cu K $\alpha$  source.

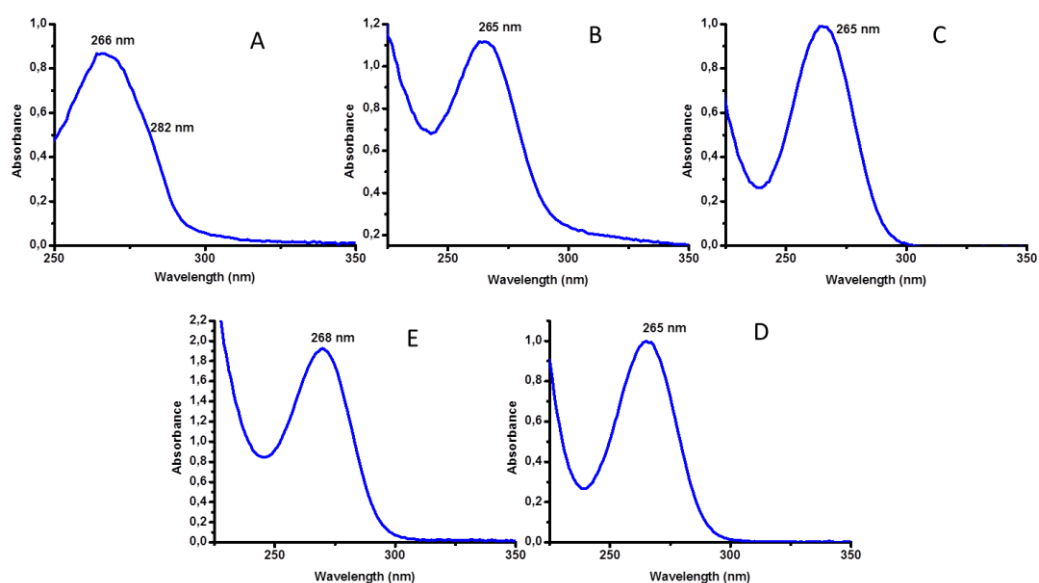

**Figure S1.** (1A) Absorbance spectrum of the crude solution obtained with route A, (1B) Supernatant of the synthesis done with route A, (1C) with route B (1D) with route C and (1E) absorbance spectrum of the mixture of thioacetamide and amines.

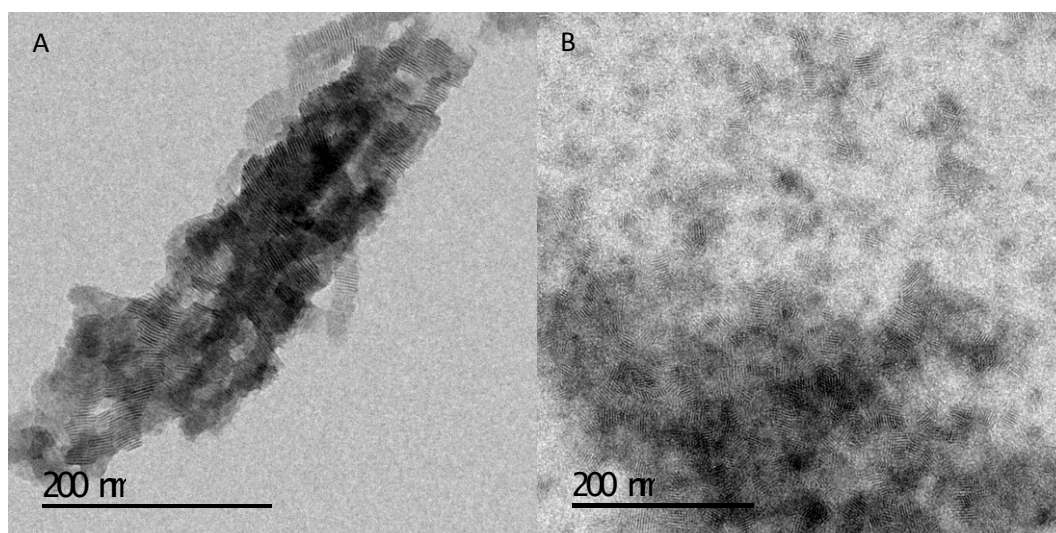

**Figure S2.** TEM images of agglomerates anisotropic nanocrystals. (2A) nanocrystals were synthesized by keeping the ratio octylamine/thioacetamide constant and vary the ratio thioacetamid/zinc comparing to route A. (2B) nanocrystals were synthesized by keeping the ratio thioacetamide/zinc constant and vary the ratio octylamine/thioacetamide comparing to route A.

**Equation S1.** Bragg's law used to determine the distance between each anisotropic nanocrystals.  $d^*$  is the distance between two plans (length of two ligands and the thickness of one NPL) and the source used is  $\lambda_{CuK\alpha} = 1,54 \text{ \AA}$ .

$$d^* = \frac{\lambda_{CuK\alpha}}{2\sin\theta}$$

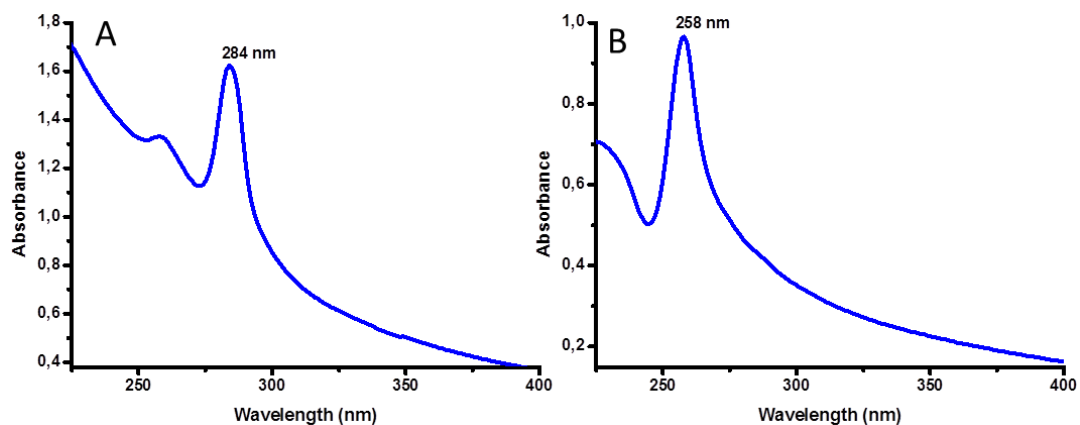

**Figure S3.** Absorbance spectrum of large scale synthesis of (A) nanowires and (B) nanoplatelets.

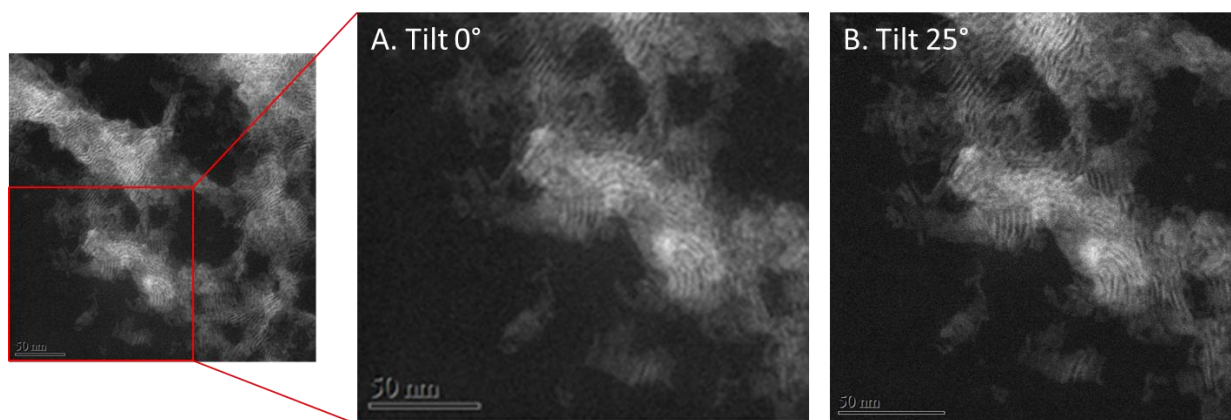

**Figure S4.** HAADF-TEM images of a sample obtained via route A with a tilt of (A) 0° and (B) 25°. We have calculated the projection of a nanoplatelet with a TEM grid tilt of 25° in order to be sure that we had obtained nanowires. If we had nanoplatelets, even with small dimensions such as 2.5 nm wide (length 10 nm and thickness 1.2 nm), a tilt of 25° would add  $\sim 1.2 \text{ nm}$  to the NPLs projection when the grid is tilted by 25°. Such increase should easily be observed on the TEM image, which is not the case. We thus conclude a wire-like morphology of the nanocrystals.
